# Supplementary material
Source: publisher figshare collection journal article supplement (https://tandf.figshare.com/articles/dataset/_/6453071)
Supplement: Supplementary file 2 [file 1]

# Package ‘OSMAC’

August 22, 2016

**Title** Optimal Subsampling for Logistic Regression

**Version** 0.0.0.0000

**Author**

**Maintainer**

**Description** This package implements the Optimal Subsampling procedure Motivated from the A-optimality Criterion.

**Depends** R (>= 3.3.1)

**License** GPL

**Encoding** UTF-8

**LazyData** true

## R topics documented:

|                       |                   |
|-----------------------|-------------------|
| adult.test . . . . .  | <a href="#">1</a> |
| adult.train . . . . . | <a href="#">2</a> |
| getMLE . . . . .      | <a href="#">3</a> |
| twostep . . . . .     | <a href="#">3</a> |

|              |                   |
|--------------|-------------------|
| <b>Index</b> | <a href="#">5</a> |
|--------------|-------------------|

---

|            |                                                 |
|------------|-------------------------------------------------|
| adult.test | <i>Validation set of the census income data</i> |
|------------|-------------------------------------------------|

---

## Description

Predict whether income exceeds 50K/yr based on census data.

## Format

The validation set contains 16,281 observations.

## Details

The variables are the same as the training set (adult.train).

---

adult.train

*Training set of the census income data*


---

### Description

Predict whether income exceeds 50K/yr based on census data.

### Format

The training set adult.train contains 32,561 observations.

### Details

The variables are as follows:

- >50K, <=50K: whether the income is above 50k per year
- age: continuous
- workclass: Private, Self-emp-not-inc, Self-emp-inc, Federal-gov, Local-gov, State-gov, Without-pay, Never-worked
- fnlwgt: continuous
- education: Bachelors, Some-college, 11th, HS-grad, Prof-school, Assoc-acdm, Assoc-voc, 9th, 7th-8th, 12th, Masters, 1st-4th, 10th, Doctorate, 5th-6th, Preschool
- education-num: continuous
- marital-status: Married-civ-spouse, Divorced, Never-married, Separated, Widowed, Married-spouse-absent, Married-AF-spouse
- occupation: Tech-support, Craft-repair, Other-service, Sales, Exec-managerial, Prof-specialty, Handlers-cleaners, Machine-op-inspct, Adm-clerical, Farming-fishing, Transport-moving, Priv-house-serv, Protective-serv, Armed-Forces
- relationship: Wife, Own-child, Husband, Not-in-family, Other-relative, Unmarried
- race: White, Asian-Pac-Islander, Amer-Indian-Eskimo, Other, Black
- sex: Female, Male
- capital-gain: continuous
- capital-loss: continuous
- hours-per-week: continuous
- native-country: United-States, Cambodia, England, Puerto-Rico, Canada, Germany, Outlying-US(Guam-USVI-etc), India, Japan, Greece, South, China, Cuba, Iran, Honduras, Philippines, Italy, Poland, Jamaica, Vietnam, Mexico, Portugal, Ireland, France, Dominican-Republic, Laos, Ecuador, Taiwan, Haiti, Columbia, Hungary, Guatemala, Nicaragua, Scotland, Thailand, Yugoslavia, El-Salvador, Trinidad&Tobago, Peru, Hong, Holand-Netherlands

getMLE

*Calculate the weighted MLE***Description**

This function calculate the weighted MLE for the input covariate matrix  $x$ , response vector  $y$ , and weight vector  $w$ . It returns a list with three elements: `par`, the weighted MLE; `msg`, the fitting message; `iter`, the number of iterations used.

**Usage**

```
getMLE(x, y, w)
```

**Arguments**

|                |                            |
|----------------|----------------------------|
| <code>x</code> | the input covariate matrix |
| <code>y</code> | the input response vector  |
| <code>w</code> | the wight vector           |

**Examples**

```
library(OSMAC)
dat <- adult.train
X <- as.matrix(dat[,c(1,3,5,12:13)])
X <- t(t(X) / apply(X, 2, sd))
X <- cbind(1, X)
Y <- as.numeric(dat[,15]) - 1
getMLE(X, Y, 1)
```

twostep

*The twostep algorithm***Description**

This function implement the OSMAC method for the input covariate matrix @param  $X$ , response vector  $Y$ , first step sample size  $r1$ , the second step sample size  $r2$ , and the method to use. It returns a list with three elements: `par`, the weighted MLE; `amse`, the standard errors; `msg`, the fitting message; `iter`, the number of iterations used; `method`, the method used.

**Usage**

```
twostep(X, Y, r1, r2, method = c("mvc", "mmse", "uni"))
```

**Arguments**

|        |                             |
|--------|-----------------------------|
| X      | the input covariate matrix  |
| Y      | the input response vector   |
| r1     | the first step sample size  |
| r2     | the second step sample size |
| method | the method to use           |

**Examples**

```
library(OSMAC)
dat <- adult.train
X <- as.matrix(dat[,c(1,3,5,12:13)])
X <- t(t(X) / apply(X, 2, sd))
X <- cbind(1, X)
Y <- as.numeric(dat[,15]) - 1
set.seed(0)
twostep(X, Y, 200, 800, "mmse")
```

# Index

## \*Topic **datasets**

adult.test, [1](#)

adult.train, [2](#)

## \*Topic **getMLE**

getMLE, [3](#)

twostep, [3](#)

## \*Topic **twostep**

twostep, [3](#)

adult.test, [1](#)

adult.train, [2](#)

getMLE, [3](#)

twostep, [3](#)
